# Supplementary material for: Photophysical and photochemical studies of tricarbonyl rhenium(i) N-heterocyclic carbene complexes containing azide and triazolate ligands
Source: Royal Society of Chemistry journal article supplement (doi:10.1039/c5nj03301b), 2016-01-01

# Photophysical and Photochemical Studies of Tricarbonyl Rhenium(I) N-Heterocyclic Carbene Complexes Containing Azide and Triazolate Ligands

Peter V. Simpson,<sup>a</sup> Brian. W. Skelton,<sup>b</sup> Paolo Raiteri,<sup>a</sup> and Massimiliano Massi<sup>\*a</sup>

<sup>a</sup> Department of Chemistry – Curtin University, Kent Street, Bentley 6102 WA, Australia. E-mail: m.massi@curtin.edu.au.

<sup>b</sup> Centre for Microscopy, Characterisation and Analysis, University of Western Australia, Crawley 6009 WA, Australia.

## Electronic Supplementary Information

### Table of Content

|                                                     |     |
|-----------------------------------------------------|-----|
| <sup>1</sup> H and <sup>13</sup> C NMR spectra..... | S2  |
| IR spectra.....                                     | S6  |
| Bond Lengths and Angles Tables.....                 | S7  |
| Excitation and Emission Profiles .....              | S11 |
| Calculated Orbitals Contours .....                  | S13 |
| Calculated Transitions .....                        | S14 |
| Calculated Absorption spectra .....                 | S31 |

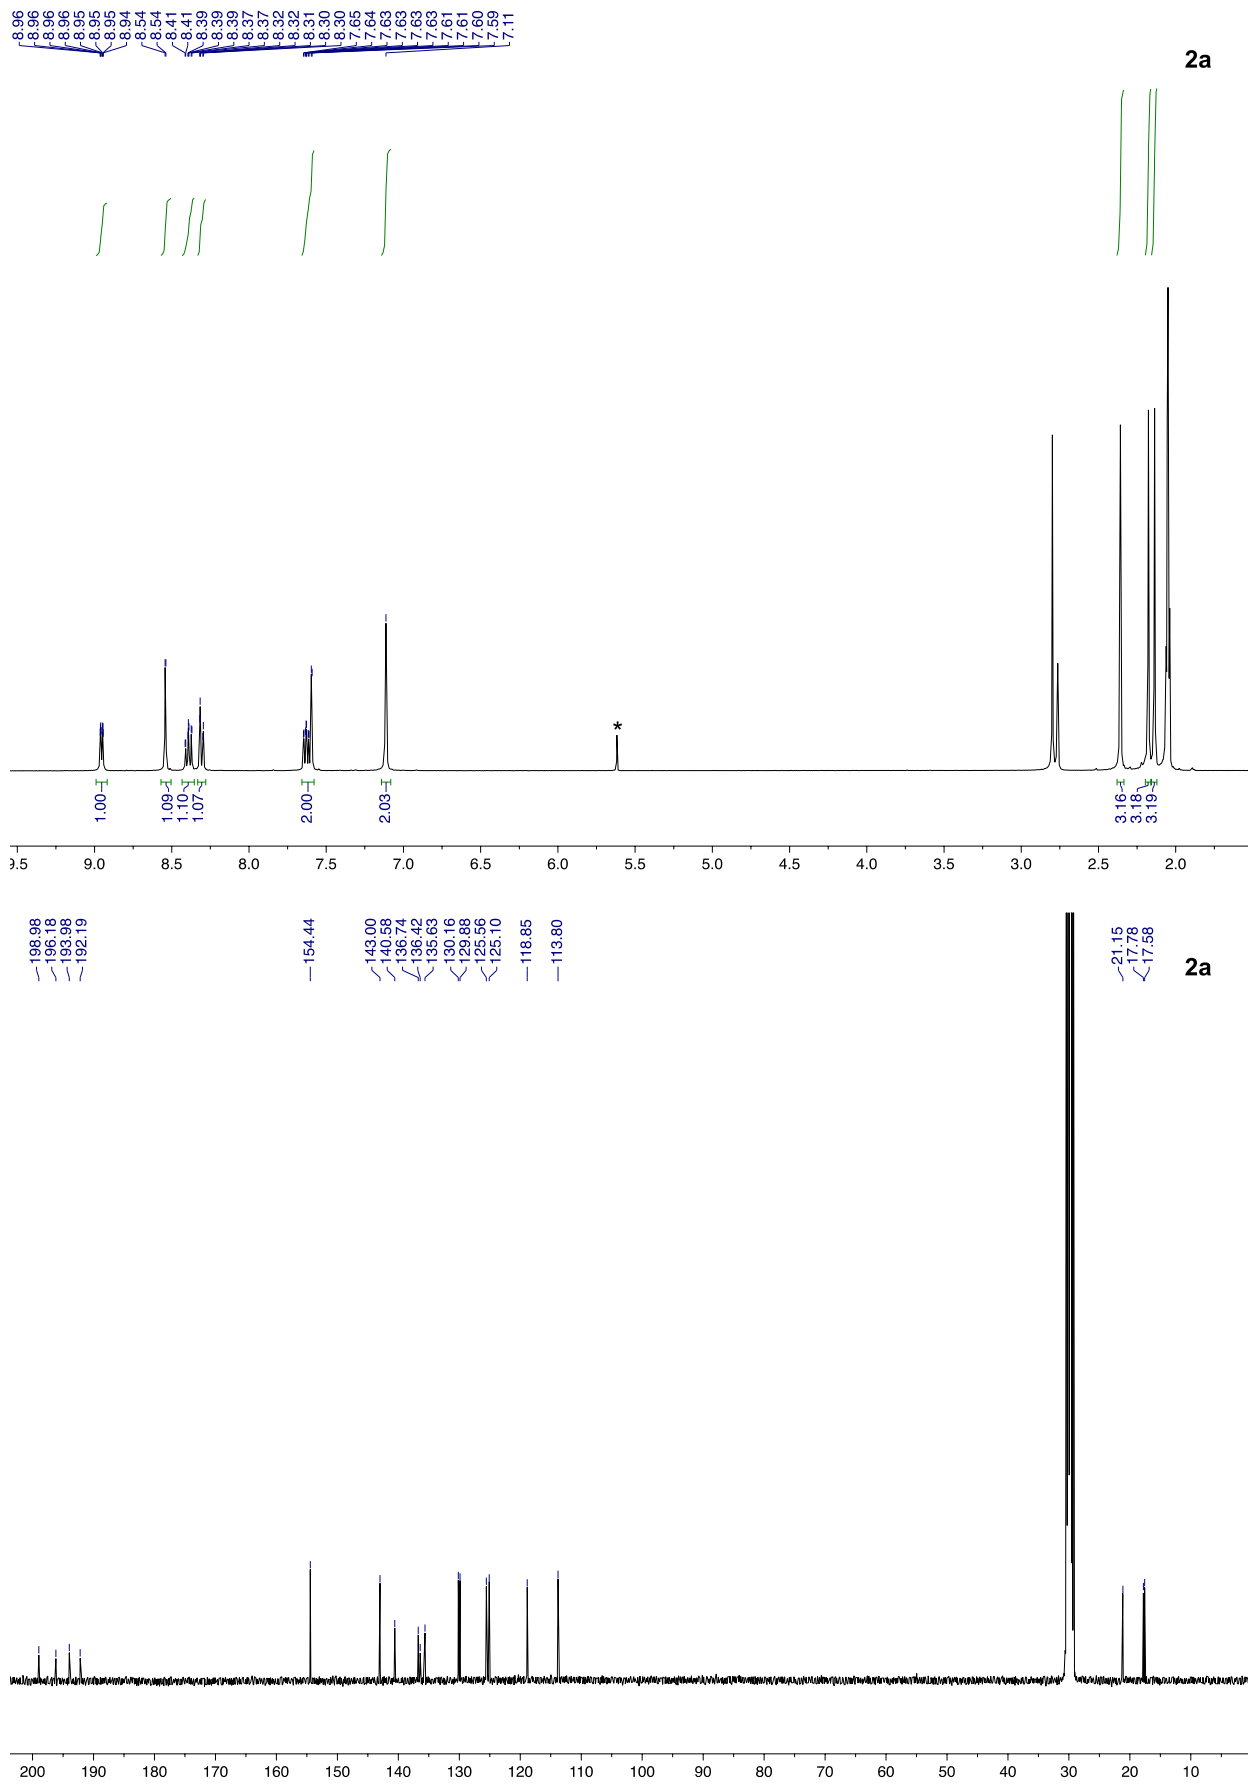

Figure S1. <sup>1</sup>H and <sup>13</sup>C NMR spectra of a d<sub>6</sub>-acetone solution of **2a**.

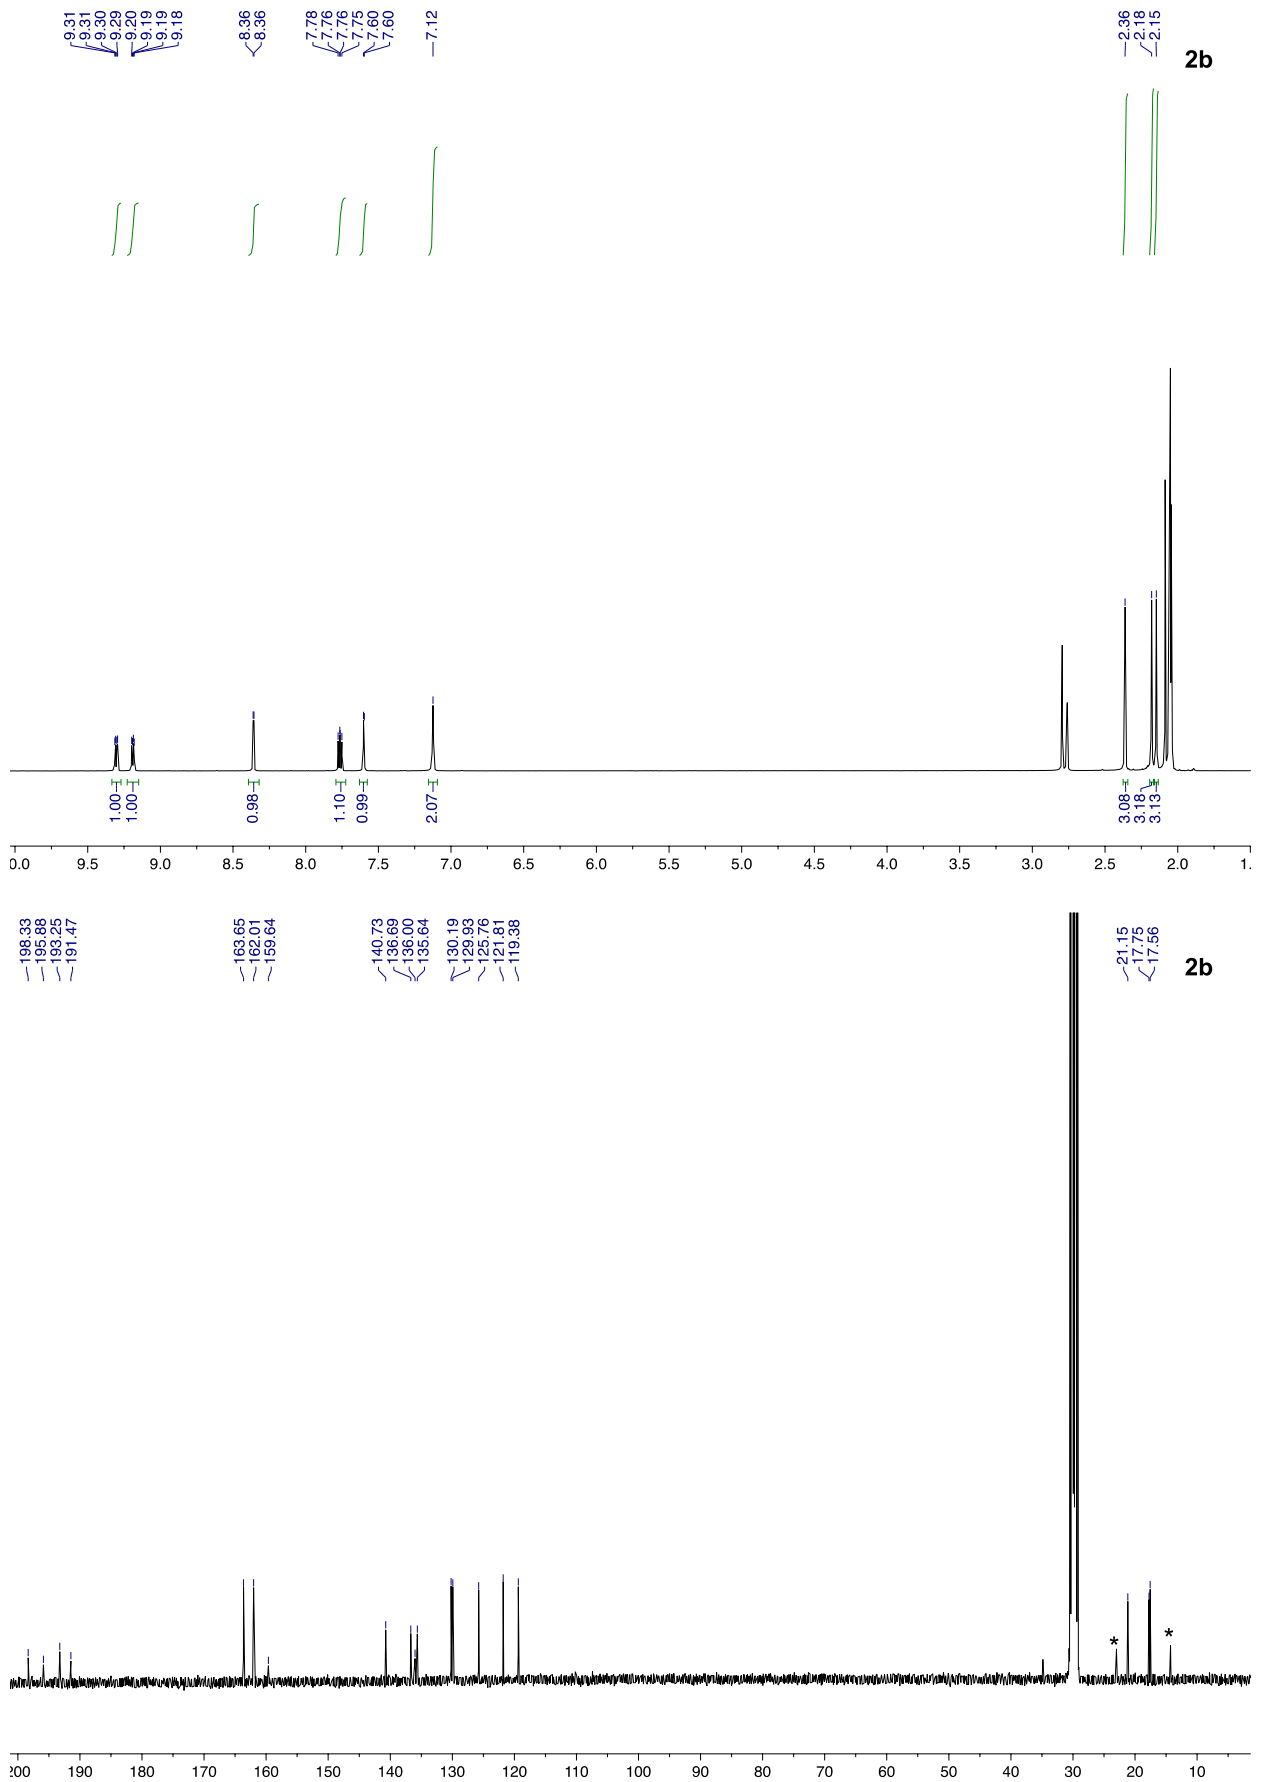

Figure S2. <sup>1</sup>H and <sup>13</sup>C NMR spectra of a d<sub>6</sub>-acetone solution of **2b**.

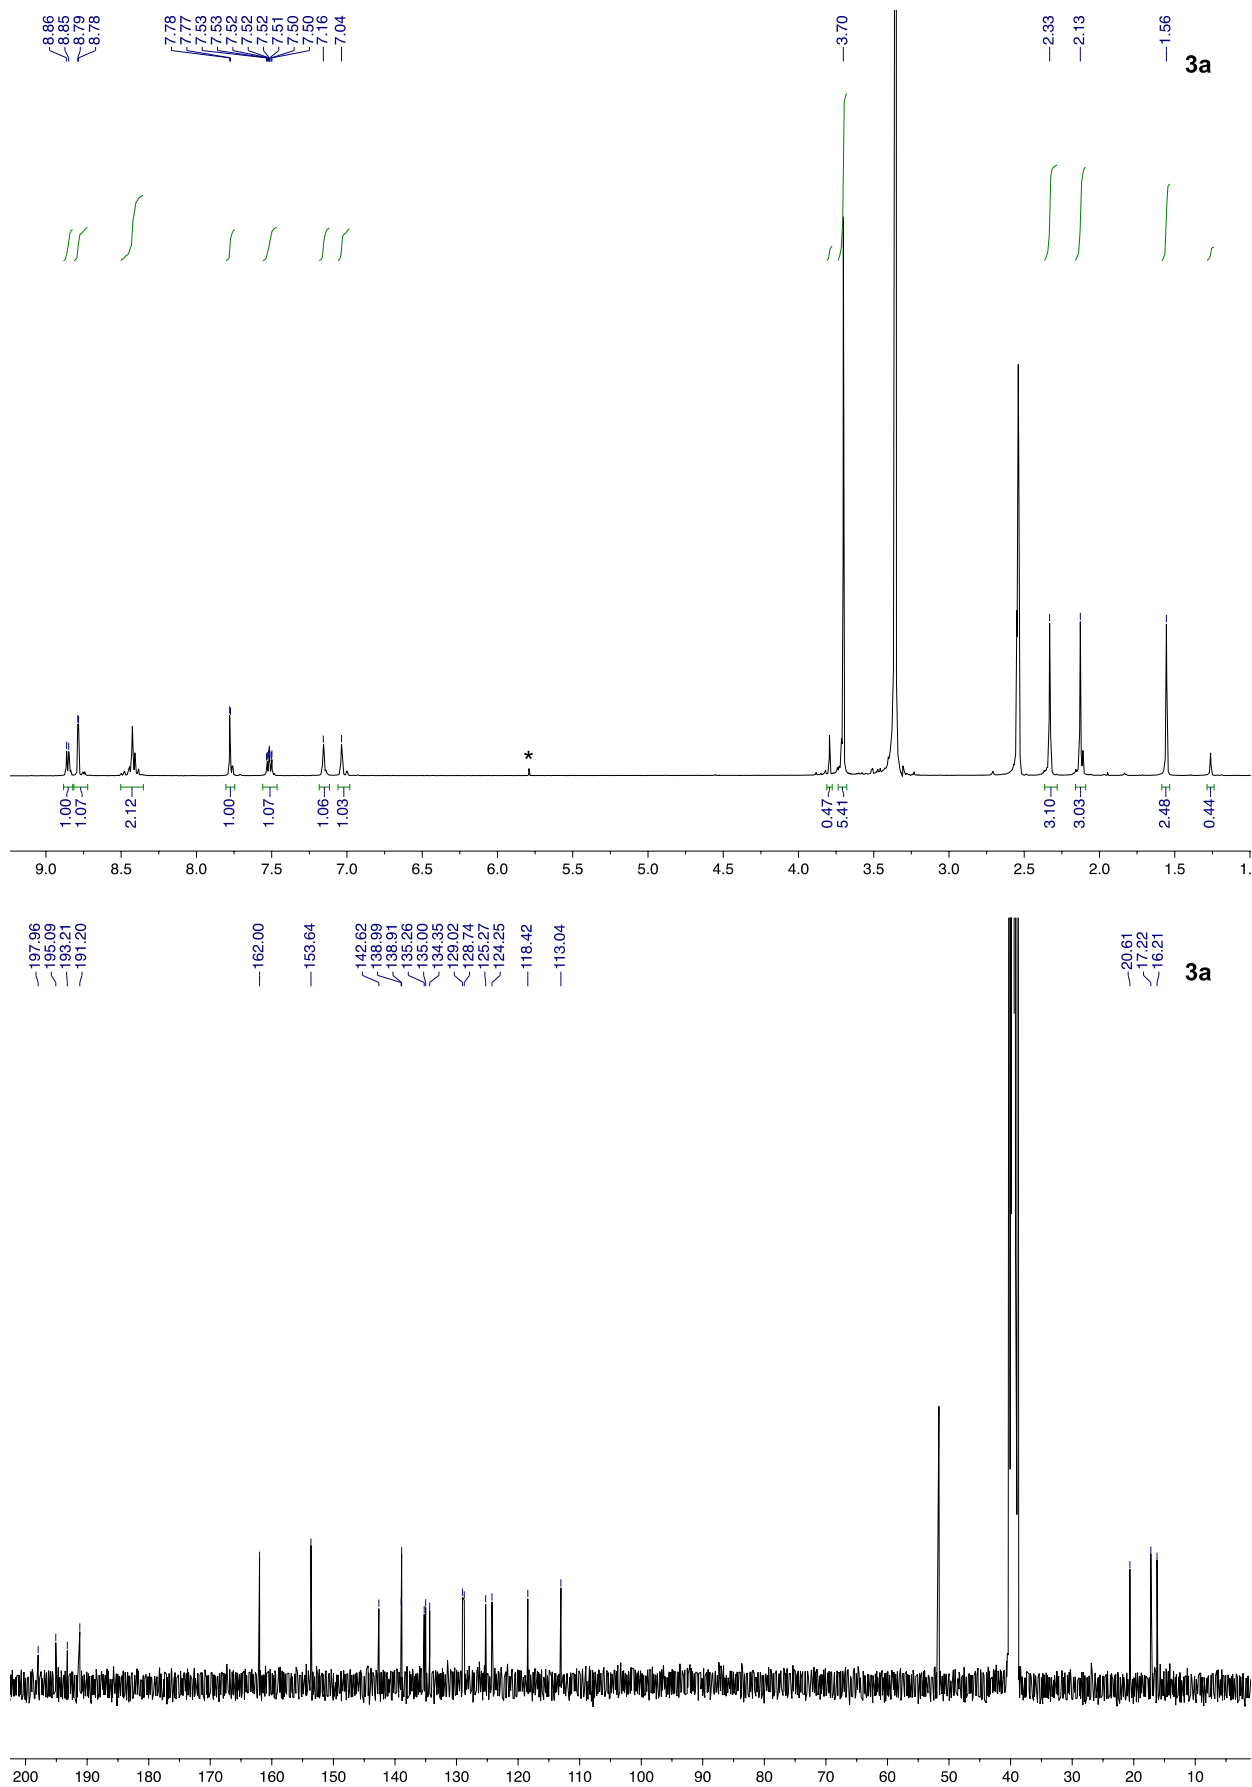

Figure S3. <sup>1</sup>H and <sup>13</sup>C NMR spectra of a d<sub>6</sub>-DMSO solution of **3a**.

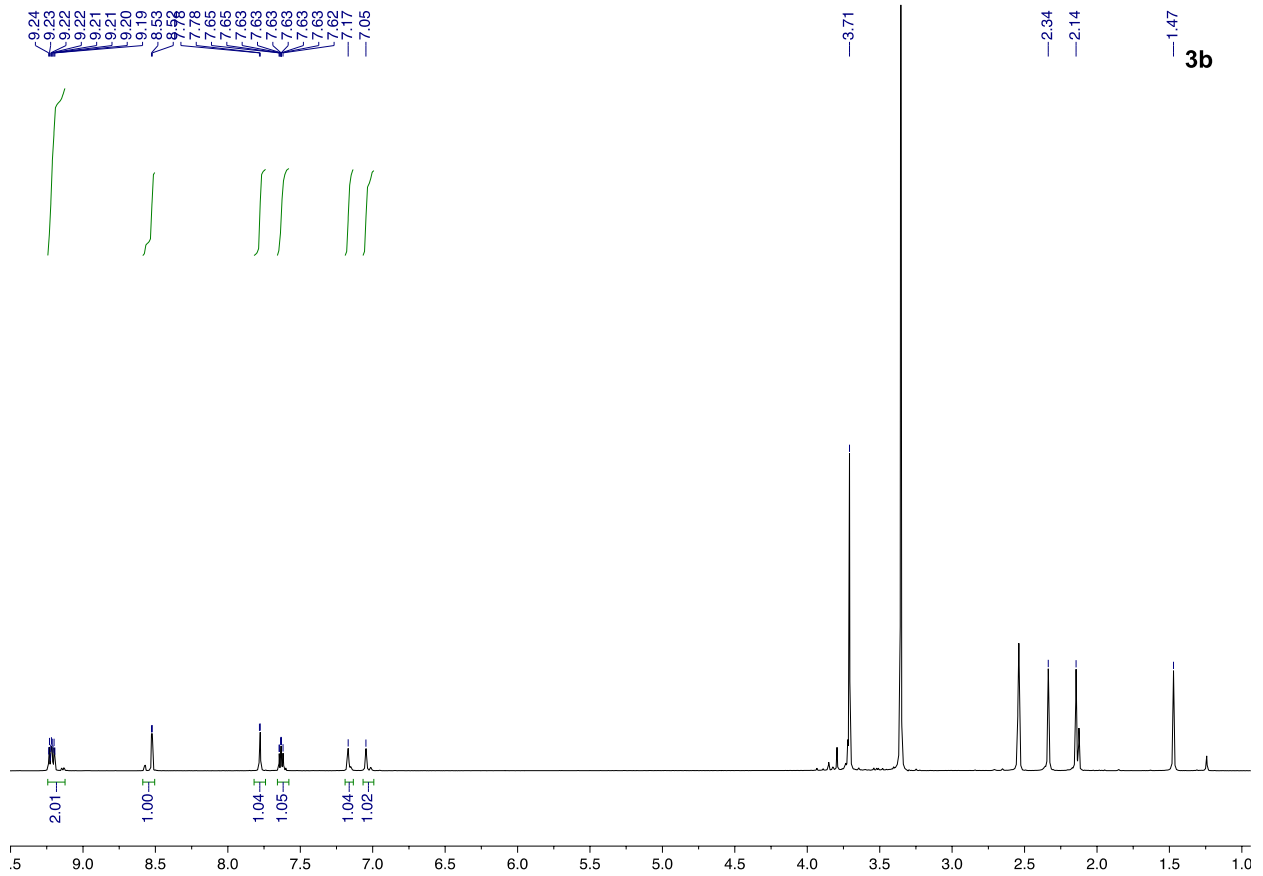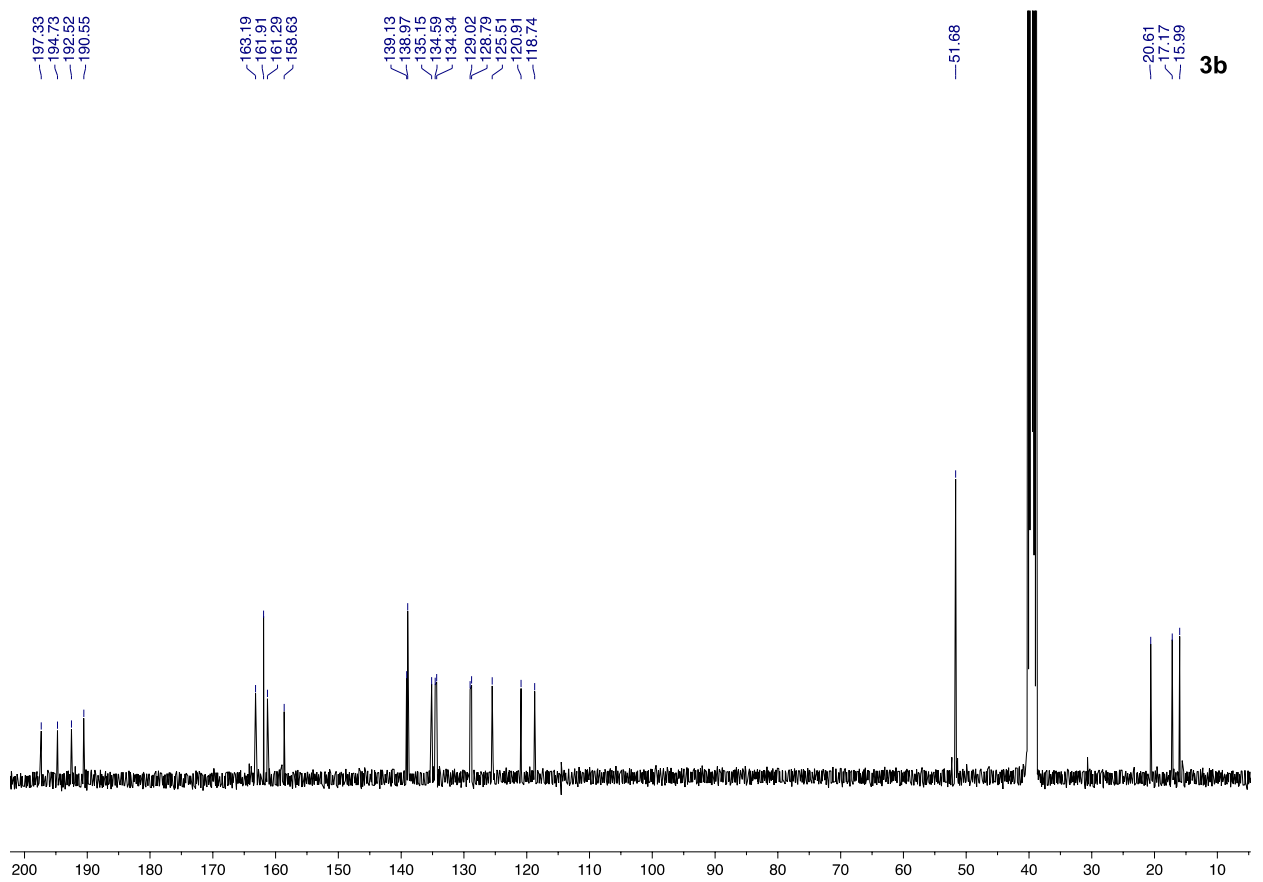

Figure S4. <sup>1</sup>H and <sup>13</sup>C NMR spectra of a d<sub>6</sub>-DMSO solution of **3b**.

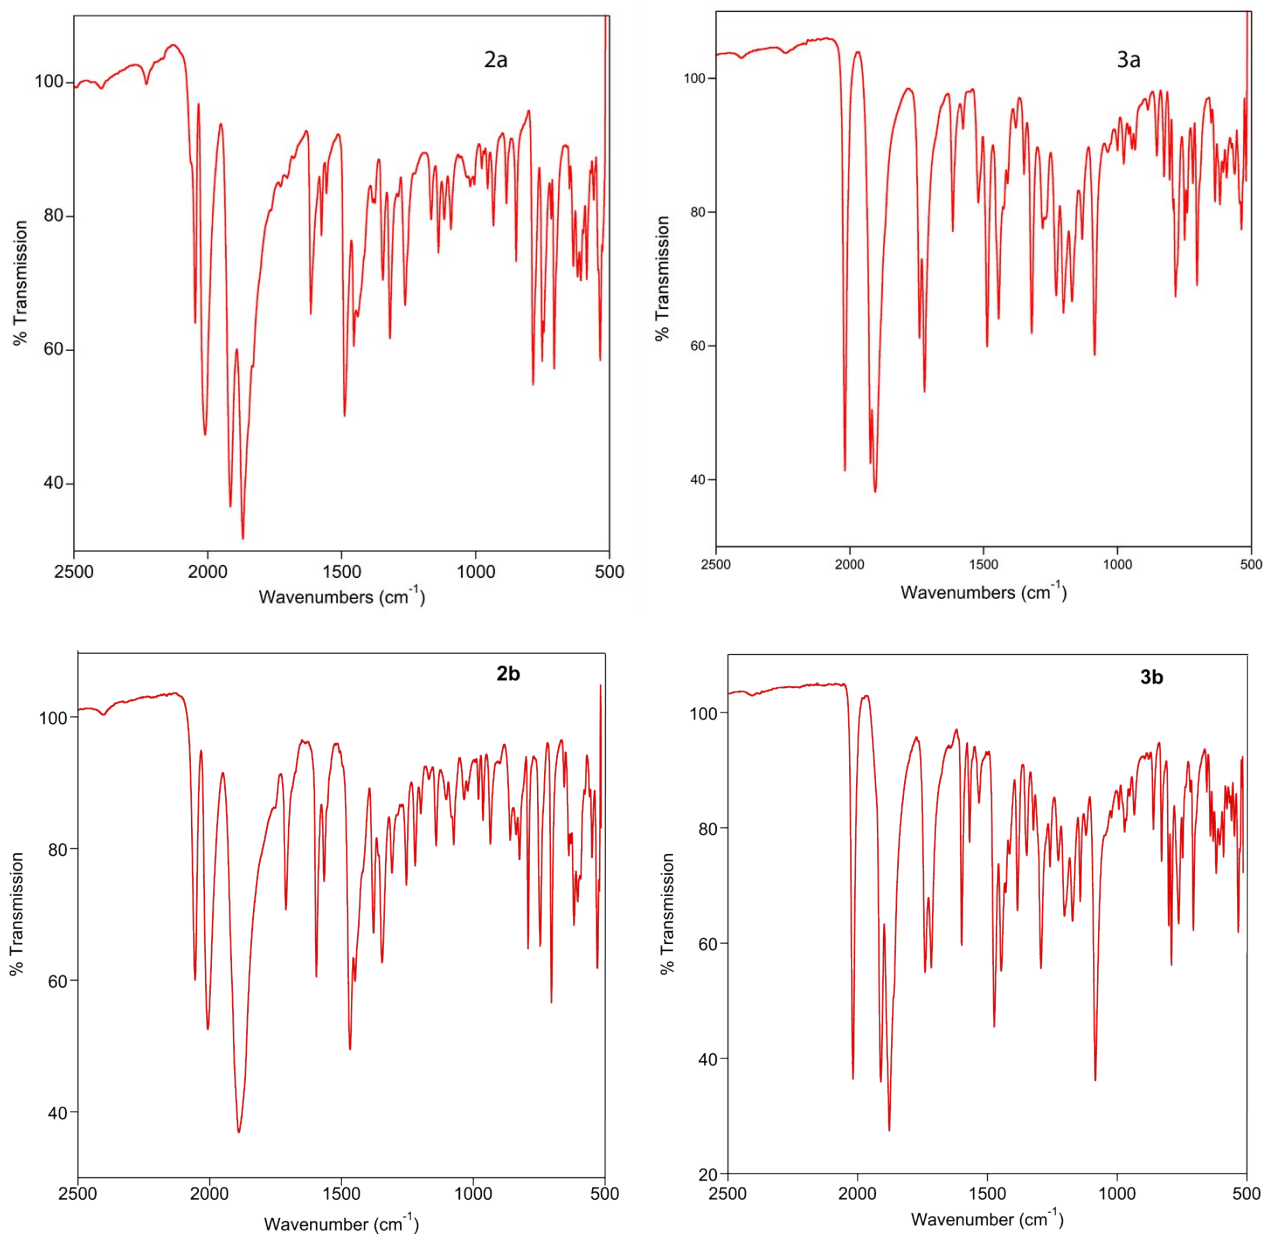

Figure S5. IR spectra of complexes **2a,b** and **3a,b**.

Table S1. Selected bond lengths [ $\text{\AA}$ ] and angles [ $^\circ$ ] for **2a**.

---

|                     |            |
|---------------------|------------|
| Re(1)-C(101)        | 1.906(4)   |
| Re(1)-C(103)        | 1.913(4)   |
| Re(1)-C(102)        | 1.965(4)   |
| Re(1)-C(2)          | 2.122(4)   |
| Re(1)-N(21)         | 2.202(3)   |
| Re(1)-N(31)         | 2.202(4)   |
|                     |            |
| C(101)-Re(1)-C(103) | 88.60(17)  |
| C(101)-Re(1)-C(102) | 90.36(16)  |
| C(103)-Re(1)-C(102) | 89.20(17)  |
| C(101)-Re(1)-C(2)   | 91.02(15)  |
| C(103)-Re(1)-C(2)   | 98.22(16)  |
| C(102)-Re(1)-C(2)   | 172.48(14) |
| C(101)-Re(1)-N(21)  | 94.66(13)  |
| C(103)-Re(1)-N(21)  | 171.45(14) |
| C(102)-Re(1)-N(21)  | 98.66(14)  |
| C(2)-Re(1)-N(21)    | 73.86(13)  |
| C(101)-Re(1)-N(31)  | 176.07(13) |
| C(103)-Re(1)-N(31)  | 94.84(15)  |
| C(102)-Re(1)-N(31)  | 91.57(15)  |
| C(2)-Re(1)-N(31)    | 86.63(14)  |
| N(21)-Re(1)-N(31)   | 81.67(12)  |

---

Table S2. Selected bond lengths [ $\text{\AA}$ ] and angles [ $^\circ$ ] for **2b**.

---

|                     |            |
|---------------------|------------|
| Re(1)-C(103)        | 1.926(5)   |
| Re(1)-C(102)        | 1.930(5)   |
| Re(1)-C(101)        | 1.963(5)   |
| Re(1)-C(2)          | 2.118(5)   |
| Re(1)-N(21)         | 2.194(4)   |
| Re(1)-N(11)         | 2.196(4)   |
|                     |            |
| C(103)-Re(1)-C(102) | 90.8(2)    |
| C(103)-Re(1)-C(101) | 89.0(2)    |
| C(102)-Re(1)-C(101) | 89.5(2)    |
| C(103)-Re(1)-C(2)   | 92.1(2)    |
| C(102)-Re(1)-C(2)   | 98.2(2)    |
| C(101)-Re(1)-C(2)   | 172.2(2)   |
| C(103)-Re(1)-N(21)  | 93.72(19)  |
| C(102)-Re(1)-N(21)  | 171.49(18) |
| C(101)-Re(1)-N(21)  | 97.80(19)  |
| C(2)-Re(1)-N(21)    | 74.44(18)  |
| C(103)-Re(1)-N(11)  | 175.88(19) |
| C(102)-Re(1)-N(11)  | 91.8(2)    |
| C(101)-Re(1)-N(11)  | 94.24(19)  |
| C(2)-Re(1)-N(11)    | 84.37(18)  |
| N(21)-Re(1)-N(11)   | 83.30(16)  |

---



Table S3. Selected bond lengths [ $\text{\AA}$ ] and angles [ $^\circ$ ] for **3a**.

---

|                     |            |
|---------------------|------------|
| Re(1)-C(101)        | 1.922(3)   |
| Re(1)-C(103)        | 1.930(3)   |
| Re(1)-C(102)        | 1.949(3)   |
| Re(1)-C(2)          | 2.125(3)   |
| Re(1)-N(42)         | 2.172(2)   |
| Re(1)-N(21)         | 2.197(2)   |
|                     |            |
| C(101)-Re(1)-C(103) | 88.94(13)  |
| C(101)-Re(1)-C(102) | 89.65(12)  |
| C(103)-Re(1)-C(102) | 90.74(13)  |
| C(101)-Re(1)-C(2)   | 94.58(11)  |
| C(103)-Re(1)-C(2)   | 99.24(12)  |
| C(102)-Re(1)-C(2)   | 169.22(11) |
| C(101)-Re(1)-N(42)  | 178.10(11) |
| C(103)-Re(1)-N(42)  | 89.17(11)  |
| C(102)-Re(1)-N(42)  | 90.49(11)  |
| C(2)-Re(1)-N(42)    | 85.61(10)  |
| C(101)-Re(1)-N(21)  | 94.46(11)  |
| C(103)-Re(1)-N(21)  | 172.82(11) |
| C(102)-Re(1)-N(21)  | 95.60(10)  |
| C(2)-Re(1)-N(21)    | 74.22(10)  |
| N(42)-Re(1)-N(21)   | 87.41(9)   |

---

Table S4. Selected bond lengths [ $\text{\AA}$ ] and angles [ $^\circ$ ] for **3b**.

---

|                     |            |
|---------------------|------------|
| Re(1)-C(101)        | 1.920(2)   |
| Re(1)-C(103)        | 1.926(2)   |
| Re(1)-C(102)        | 1.949(2)   |
| Re(1)-C(2)          | 2.134(2)   |
| Re(1)-N(42)         | 2.1657(18) |
| Re(1)-N(21)         | 2.2100(18) |
|                     |            |
| C(101)-Re(1)-C(103) | 89.38(10)  |
| C(101)-Re(1)-C(102) | 90.88(10)  |
| C(103)-Re(1)-C(102) | 90.96(9)   |
| C(101)-Re(1)-C(2)   | 92.20(10)  |
| C(103)-Re(1)-C(2)   | 97.74(9)   |
| C(102)-Re(1)-C(2)   | 170.80(9)  |
| C(101)-Re(1)-N(42)  | 178.12(9)  |
| C(103)-Re(1)-N(42)  | 88.79(8)   |
| C(102)-Re(1)-N(42)  | 89.55(8)   |
| C(2)-Re(1)-N(42)    | 87.64(7)   |
| C(101)-Re(1)-N(21)  | 95.22(8)   |
| C(103)-Re(1)-N(21)  | 170.94(8)  |
| C(102)-Re(1)-N(21)  | 96.76(8)   |
| C(2)-Re(1)-N(21)    | 74.33(8)   |
| N(42)-Re(1)-N(21)   | 86.54(7)   |

---

Figure S6. Excitation spectra of all complexes from a  $ca\ 10^{-5}$  M solution in dichloromethane.

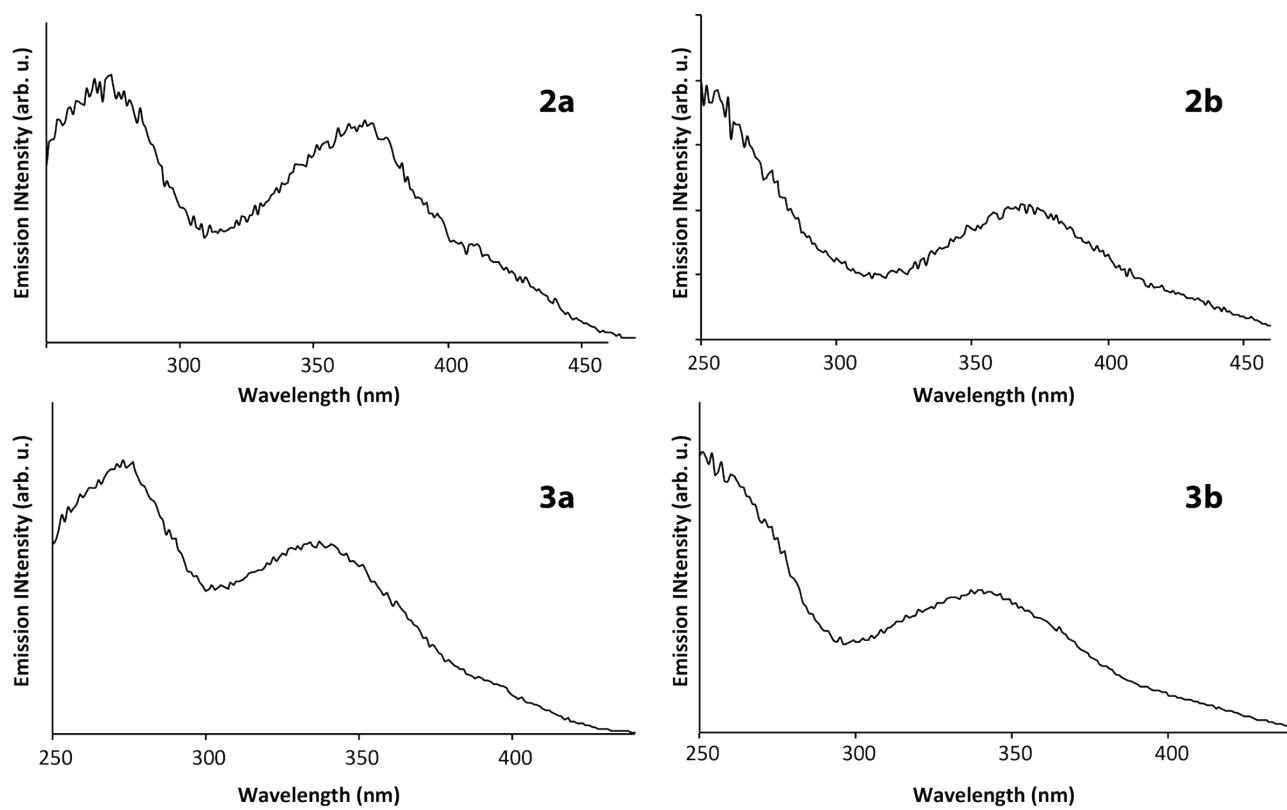

Figure S7. Excitation and emission spectra of all complexes from a  $ca\ 10^{-5}$  M solution in dichloromethane at 77 K.

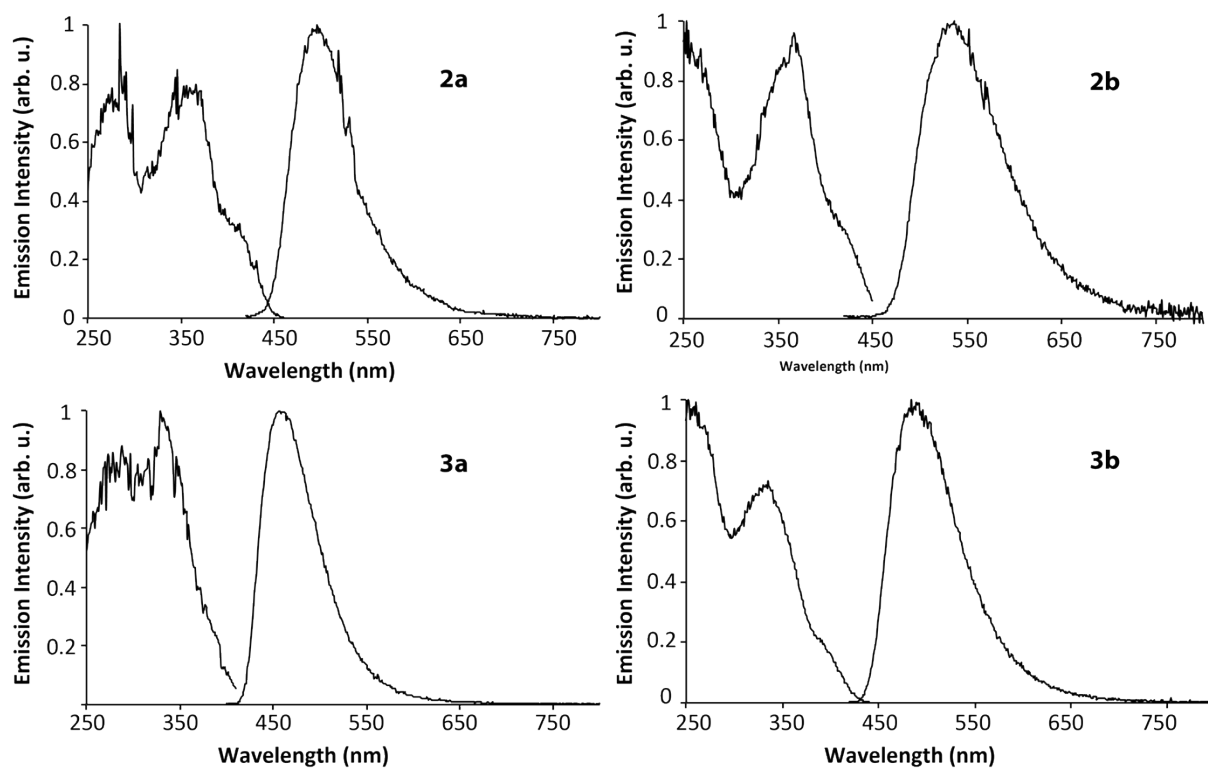

Figure S8. Selected occupied orbital contours of **3a**, **2b**, and **3b**.

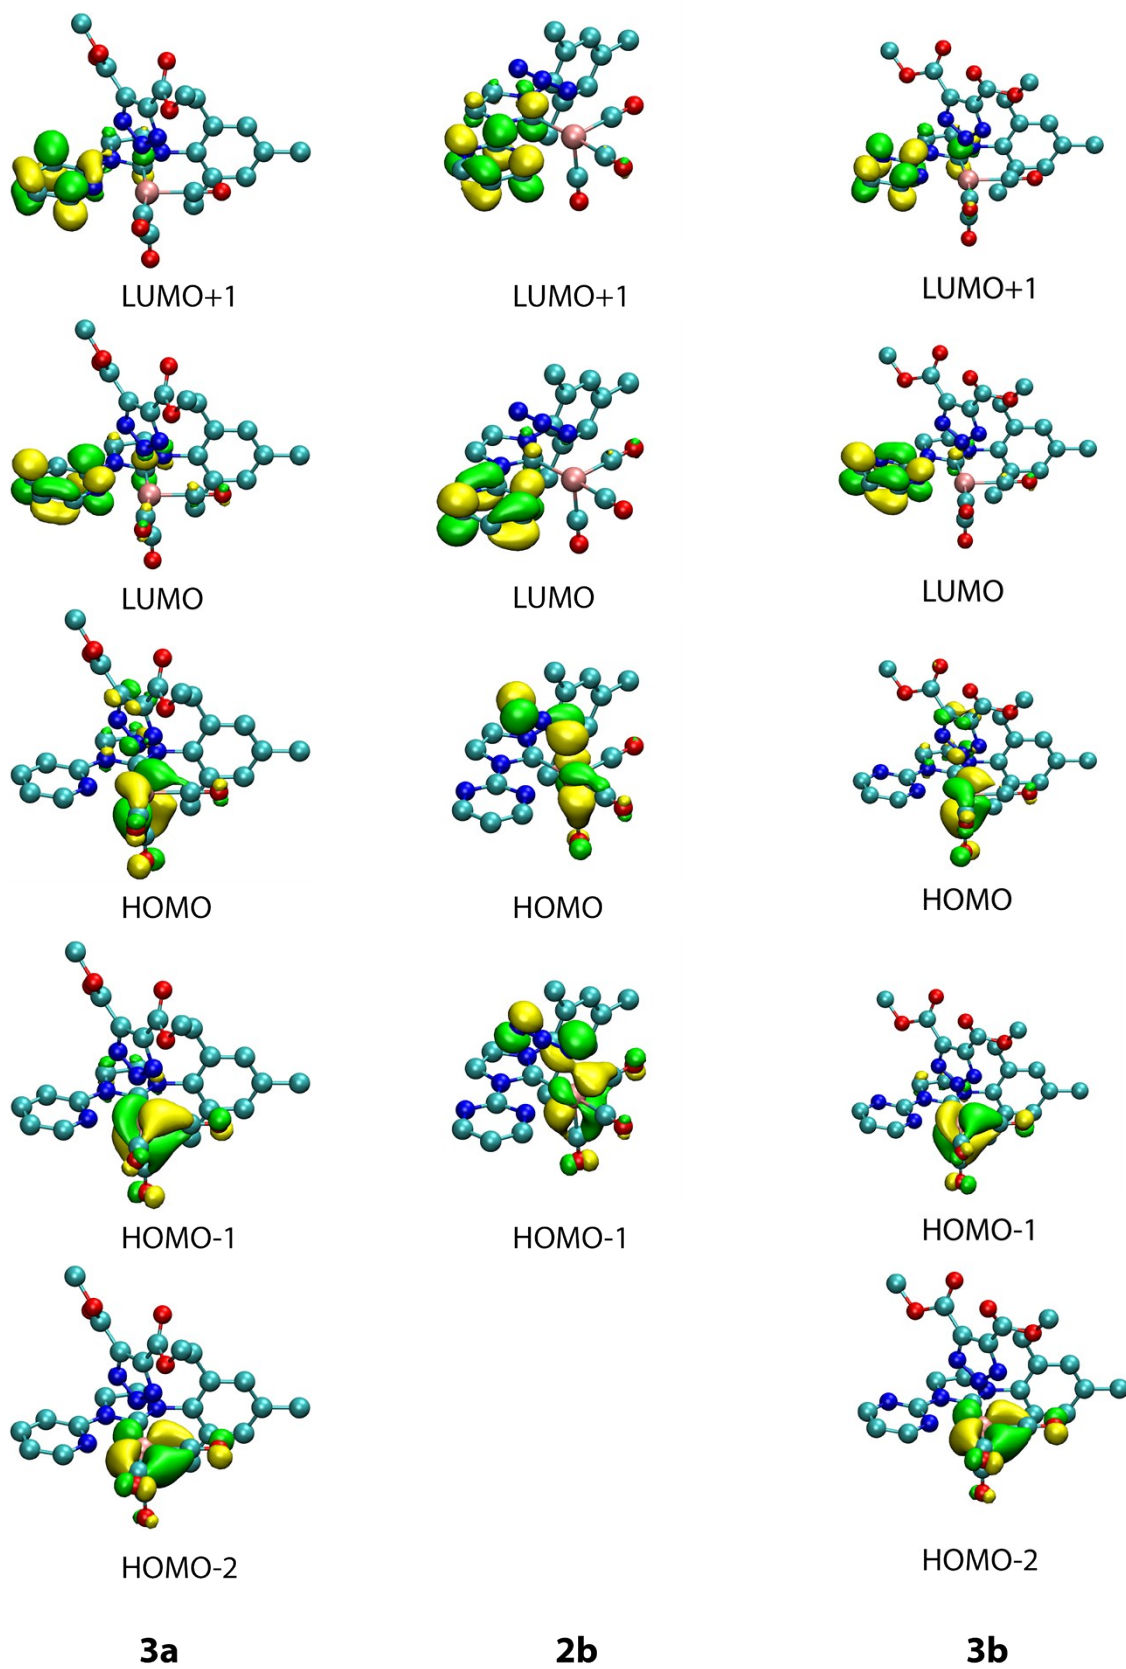

Table S5. Calculated transitions for **2a**.

| Wavelength | Intensity | Levels           | Character |
|------------|-----------|------------------|-----------|
| 468.04 nm  | 0.0054    | HOMO -> LUMO     | 99.10%    |
| 390.33 nm  | 0.0674    | HOMO-1 -> LUMO   | 95.50%    |
|            |           | HOMO -> LUMO+1   | 3.10%     |
| 378.34 nm  | 0.0203    | HOMO-1 -> LUMO   | 3.20%     |
|            |           | HOMO -> LUMO+1   | 95.70%    |
| 351.85 nm  | 0.0006    | HOMO-2 -> LUMO   | 95.60%    |
| 332.21 nm  | 0.0344    | HOMO-3 -> LUMO   | 12.00%    |
|            |           | HOMO -> LUMO+2   | 79.30%    |
| 331.33 nm  | 0.0099    | HOMO-3 -> LUMO   | 7.10%     |
|            |           | HOMO-1 -> LUMO+1 | 90.80%    |
| 327.62 nm  | 0.0377    | HOMO-3 -> LUMO   | 76.00%    |
|            |           | HOMO-1 -> LUMO+1 | 6.50%     |
|            |           | HOMO -> LUMO+2   | 11.80%    |
| 315.72 nm  | 0.0273    | HOMO-6 -> LUMO   | 5.10%     |
|            |           | HOMO-5 -> LUMO   | 3.80%     |
|            |           | HOMO-4 -> LUMO   | 4.70%     |
|            |           | HOMO-2 -> LUMO+2 | 2.80%     |
|            |           | HOMO-1 -> LUMO+2 | 5.70%     |
|            |           | HOMO -> LUMO+3   | 67.70%    |
|            |           | HOMO -> LUMO+4   | 2.40%     |
| 310.81 nm  | 0.0762    | HOMO-6 -> LUMO   | 27.60%    |
|            |           | HOMO-5 -> LUMO   | 21.90%    |
|            |           | HOMO-4 -> LUMO   | 30.10%    |
|            |           | HOMO-3 -> LUMO   | 2.50%     |
|            |           | HOMO -> LUMO+3   | 12.60%    |

|           |        |                  |        |
|-----------|--------|------------------|--------|
|           |        |                  |        |
| 301.97 nm | 0.0149 | HOMO-1 -> LUMO+2 | 75.00% |
|           |        | HOMO-1 -> LUMO+3 | 7.00%  |
|           |        | HOMO-1 -> LUMO+4 | 3.40%  |
|           |        | HOMO -> LUMO+3   | 7.40%  |
|           |        |                  |        |
| 295.09 nm | 0.001  | HOMO-2 -> LUMO+1 | 94.40% |
|           |        | HOMO-2 -> LUMO+3 | 2.50%  |
|           |        |                  |        |
| 294.42 nm | 0.003  | HOMO-6 -> LUMO   | 18.40% |
|           |        | HOMO-5 -> LUMO   | 17.80% |
|           |        | HOMO-4 -> LUMO   | 62.20% |
|           |        |                  |        |
| 293.28 nm | 0.0024 | HOMO-6 -> LUMO   | 43.90% |
|           |        | HOMO-5 -> LUMO   | 52.90% |
|           |        |                  |        |
| 284.74 nm | 0.0016 | HOMO-3 -> LUMO+1 | 5.90%  |
|           |        | HOMO-1 -> LUMO+3 | 2.50%  |
|           |        | HOMO -> LUMO+2   | 2.40%  |
|           |        | HOMO -> LUMO+3   | 2.60%  |
|           |        | HOMO -> LUMO+4   | 80.40% |
|           |        | HOMO -> LUMO+7   | 2.80%  |
|           |        |                  |        |
| 283.31 nm | 0.0469 | HOMO-3 -> LUMO+1 | 80.50% |
|           |        | HOMO-2 -> LUMO+2 | 2.10%  |
|           |        | HOMO-1 -> LUMO+3 | 4.10%  |
|           |        | HOMO -> LUMO+4   | 8.90%  |
|           |        |                  |        |
| 281.18 nm | 0.0069 | HOMO-3 -> LUMO+1 | 7.00%  |
|           |        | HOMO-1 -> LUMO+2 | 7.10%  |
|           |        | HOMO-1 -> LUMO+3 | 69.50% |
|           |        | HOMO -> LUMO+9   | 3.10%  |
|           |        |                  |        |
| 275.37 nm | 0.0007 | HOMO-7 -> LUMO   | 5.80%  |
|           |        | HOMO-6 -> LUMO+1 | 7.80%  |
|           |        | HOMO-5 -> LUMO+1 | 5.60%  |
|           |        | HOMO-4 -> LUMO+1 | 6.40%  |

|           |        |                  |        |
|-----------|--------|------------------|--------|
|           |        | HOMO-3 -> LUMO+1 | 2.80%  |
|           |        | HOMO-2 -> LUMO+2 | 3.90%  |
|           |        | HOMO -> LUMO+5   | 7.00%  |
|           |        | HOMO -> LUMO+7   | 18.90% |
|           |        | HOMO -> LUMO+9   | 2.20%  |
|           |        | HOMO -> LUMO+10  | 11.50% |
|           |        | HOMO -> LUMO+11  | 5.00%  |
|           |        | HOMO -> LUMO+13  | 2.20%  |
|           |        | HOMO -> LUMO+14  | 2.10%  |
|           |        | HOMO -> LUMO+15  | 5.10%  |
|           |        |                  |        |
| 272.36 nm | 0.0173 | HOMO-7 -> LUMO   | 8.80%  |
|           |        | HOMO-6 -> LUMO+1 | 17.40% |
|           |        | HOMO-5 -> LUMO+1 | 12.60% |
|           |        | HOMO-4 -> LUMO+1 | 15.10% |
|           |        | HOMO -> LUMO+5   | 35.20% |
|           |        | HOMO -> LUMO+10  | 2.70%  |
|           |        |                  |        |
| 271.57 nm | 0.0228 | HOMO-6 -> LUMO+1 | 5.00%  |
|           |        | HOMO-5 -> LUMO+1 | 3.80%  |
|           |        | HOMO-4 -> LUMO+1 | 4.60%  |
|           |        | HOMO -> LUMO+5   | 51.10% |
|           |        | HOMO -> LUMO+7   | 20.90% |
|           |        | HOMO -> LUMO+10  | 2.60%  |
|           |        |                  |        |
| 268.99 nm | 0.0066 | HOMO-2 -> LUMO+2 | 52.50% |
|           |        | HOMO-2 -> LUMO+3 | 6.90%  |
|           |        | HOMO-2 -> LUMO+7 | 2.20%  |
|           |        | HOMO-1 -> LUMO+7 | 2.90%  |
|           |        | HOMO -> LUMO+6   | 2.20%  |
|           |        | HOMO -> LUMO+7   | 9.70%  |
|           |        | HOMO -> LUMO+9   | 3.90%  |
|           |        |                  |        |
| 267.10 nm | 0.0198 | HOMO-7 -> LUMO   | 3.30%  |
|           |        | HOMO-2 -> LUMO+2 | 6.80%  |
|           |        | HOMO-2 -> LUMO+3 | 5.20%  |
|           |        | HOMO -> LUMO+3   | 3.10%  |



|           |        |                  |        |
|-----------|--------|------------------|--------|
|           |        | HOMO -> LUMO+5   | 4.30%  |
|           |        | HOMO -> LUMO+6   | 13.00% |
|           |        | HOMO -> LUMO+7   | 19.20% |
|           |        | HOMO -> LUMO+9   | 14.50% |
|           |        | HOMO -> LUMO+10  | 7.00%  |
|           |        | HOMO -> LUMO+12  | 2.40%  |
|           |        | HOMO -> LUMO+15  | 3.90%  |
|           |        |                  |        |
| 262.36 nm | 0.0144 | HOMO-7 -> LUMO   | 9.40%  |
|           |        | HOMO-4 -> LUMO+1 | 2.00%  |
|           |        | HOMO-2 -> LUMO+3 | 43.90% |
|           |        | HOMO-2 -> LUMO+4 | 2.60%  |
|           |        | HOMO-1 -> LUMO+4 | 3.70%  |
|           |        | HOMO-1 -> LUMO+7 | 4.10%  |
|           |        | HOMO -> LUMO+6   | 2.50%  |
|           |        | HOMO -> LUMO+8   | 4.20%  |
|           |        | HOMO -> LUMO+9   | 6.40%  |
|           |        | HOMO -> LUMO+10  | 5.10%  |
|           |        |                  |        |
| 261.31 nm | 0.1332 | HOMO-7 -> LUMO   | 36.80% |
|           |        | HOMO-4 -> LUMO+1 | 6.10%  |
|           |        | HOMO-2 -> LUMO+3 | 2.30%  |
|           |        | HOMO-1 -> LUMO+4 | 2.60%  |
|           |        | HOMO-1 -> LUMO+7 | 2.90%  |
|           |        | HOMO -> LUMO+6   | 5.80%  |
|           |        | HOMO -> LUMO+8   | 8.10%  |
|           |        | HOMO -> LUMO+9   | 11.10% |
|           |        | HOMO -> LUMO+10  | 2.80%  |
|           |        | HOMO -> LUMO+12  | 2.70%  |
|           |        |                  |        |
| 259.09 nm | 0.1536 | HOMO-7 -> LUMO   | 22.20% |
|           |        | HOMO-4 -> LUMO+1 | 9.60%  |
|           |        | HOMO-3 -> LUMO+3 | 3.70%  |
|           |        | HOMO-2 -> LUMO+2 | 4.50%  |
|           |        | HOMO-2 -> LUMO+3 | 18.20% |
|           |        | HOMO-1 -> LUMO+9 | 3.30%  |
|           |        | HOMO -> LUMO+8   | 6.30%  |

|           |        |                  |        |
|-----------|--------|------------------|--------|
|           |        | HOMO -> LUMO+9   | 11.50% |
|           |        |                  |        |
| 257.62 nm | 0.0116 | HOMO-3 -> LUMO+2 | 3.20%  |
|           |        | HOMO-2 -> LUMO+3 | 2.80%  |
|           |        | HOMO-1 -> LUMO+2 | 2.00%  |
|           |        | HOMO-1 -> LUMO+3 | 3.30%  |
|           |        | HOMO-1 -> LUMO+4 | 80.20% |

Table S6. Calculated transitions for **2b**.

| Wavelength | Intensity | Levels           | Character |
|------------|-----------|------------------|-----------|
| 502.79 nm  | 0.004     | HOMO -> LUMO     | 98.10%    |
| 439.27 nm  | 0.0049    | HOMO -> LUMO+1   | 97.00%    |
| 411.91 nm  | 0.0691    | HOMO-1 -> LUMO   | 97.70%    |
| 374.15 nm  | 0.0114    | HOMO-1 -> LUMO+1 | 98.30%    |
| 366.50 nm  | 0.0005    | HOMO-2 -> LUMO   | 93.30%    |
|            |           | HOMO-2 -> LUMO+1 | 3.60%     |
| 343.58 nm  | 0.0204    | HOMO-3 -> LUMO   | 94.60%    |
| 334.01 nm  | 0.0298    | HOMO -> LUMO+2   | 90.80%    |
| 328.78 nm  | 0.0012    | HOMO-2 -> LUMO   | 3.90%     |
|            |           | HOMO-2 -> LUMO+1 | 93.00%    |
| 324.43 nm  | 0.0582    | HOMO-6 -> LUMO   | 59.90%    |
|            |           | HOMO-5 -> LUMO   | 9.60%     |
|            |           | HOMO-4 -> LUMO   | 15.80%    |
|            |           | HOMO-3 -> LUMO   | 2.20%     |
|            |           | HOMO-3 -> LUMO+1 | 4.70%     |
|            |           | HOMO -> LUMO+3   | 3.30%     |
| 318.17 nm  | 0.0159    | HOMO-3 -> LUMO+1 | 6.10%     |
|            |           | HOMO-1 -> LUMO+2 | 4.90%     |
|            |           | HOMO -> LUMO+3   | 77.50%    |
| 313.34 nm  | 0.0833    | HOMO-6 -> LUMO   | 2.50%     |
|            |           | HOMO-4 -> LUMO   | 5.00%     |
|            |           | HOMO-3 -> LUMO+1 | 84.90%    |
|            |           | HOMO -> LUMO+3   | 3.40%     |

|           |        |                  |        |
|-----------|--------|------------------|--------|
|           |        |                  |        |
| 309.57 nm | 0.0088 | HOMO-6 -> LUMO   | 13.70% |
|           |        | HOMO-5 -> LUMO   | 7.70%  |
|           |        | HOMO-4 -> LUMO   | 73.20% |
|           |        | HOMO-4 -> LUMO+1 | 3.40%  |
|           |        |                  |        |
| 307.62 nm | 0.0053 | HOMO-6 -> LUMO   | 17.40% |
|           |        | HOMO-5 -> LUMO   | 73.90% |
|           |        | HOMO-5 -> LUMO+1 | 5.20%  |
|           |        |                  |        |
| 302.29 nm | 0.0179 | HOMO-6 -> LUMO+1 | 2.10%  |
|           |        | HOMO-1 -> LUMO+2 | 74.00% |
|           |        | HOMO-1 -> LUMO+3 | 8.20%  |
|           |        | HOMO -> LUMO+3   | 6.20%  |
|           |        |                  |        |
| 299.04 nm | 0.013  | HOMO-6 -> LUMO+1 | 65.40% |
|           |        | HOMO-5 -> LUMO+1 | 10.00% |
|           |        | HOMO-4 -> LUMO+1 | 16.50% |
|           |        | HOMO-1 -> LUMO+2 | 2.20%  |
|           |        |                  |        |
| 286.79 nm | 0.0003 | HOMO-6 -> LUMO+1 | 11.90% |
|           |        | HOMO-5 -> LUMO+1 | 5.90%  |
|           |        | HOMO-4 -> LUMO   | 3.10%  |
|           |        | HOMO-4 -> LUMO+1 | 77.70% |
|           |        |                  |        |
| 285.11 nm | 0.0003 | HOMO-6 -> LUMO+1 | 14.70% |
|           |        | HOMO-5 -> LUMO   | 5.00%  |
|           |        | HOMO-5 -> LUMO+1 | 76.10% |
|           |        |                  |        |
| 283.20 nm | 0.0116 | HOMO-1 -> LUMO+2 | 6.50%  |
|           |        | HOMO-1 -> LUMO+3 | 62.10% |
|           |        | HOMO -> LUMO+4   | 18.30% |
|           |        | HOMO -> LUMO+7   | 2.20%  |
|           |        |                  |        |
| 282.12 nm | 0.0103 | HOMO-1 -> LUMO+2 | 2.80%  |
|           |        | HOMO-1 -> LUMO+3 | 16.10% |
|           |        | HOMO -> LUMO+4   | 70.60% |

|           |        |                  |        |
|-----------|--------|------------------|--------|
|           |        | HOMO -> LUMO+7   | 2.60%  |
|           |        |                  |        |
| 274.53 nm | 0.0099 | HOMO-2 -> LUMO+2 | 7.90%  |
|           |        | HOMO -> LUMO+4   | 5.70%  |
|           |        | HOMO -> LUMO+5   | 5.00%  |
|           |        | HOMO -> LUMO+7   | 30.30% |
|           |        | HOMO -> LUMO+10  | 18.20% |
|           |        | HOMO -> LUMO+12  | 3.70%  |
|           |        | HOMO -> LUMO+14  | 5.50%  |
|           |        | HOMO -> LUMO+15  | 3.50%  |
|           |        |                  |        |
| 270.64 nm | 0.0076 | HOMO-2 -> LUMO+2 | 55.30% |
|           |        | HOMO-2 -> LUMO+3 | 13.20% |
|           |        | HOMO-2 -> LUMO+7 | 2.10%  |
|           |        | HOMO -> LUMO+6   | 2.50%  |
|           |        | HOMO -> LUMO+7   | 10.20% |
|           |        |                  |        |
| 269.46 nm | 0.0088 | HOMO -> LUMO+5   | 77.60% |
|           |        | HOMO -> LUMO+6   | 5.00%  |
|           |        | HOMO -> LUMO+7   | 9.30%  |
|           |        |                  |        |
| 266.77 nm | 0.0122 | HOMO-2 -> LUMO+3 | 6.80%  |
|           |        | HOMO -> LUMO+5   | 16.60% |
|           |        | HOMO -> LUMO+6   | 19.00% |
|           |        | HOMO -> LUMO+7   | 11.90% |
|           |        | HOMO -> LUMO+8   | 9.20%  |
|           |        | HOMO -> LUMO+9   | 3.30%  |
|           |        | HOMO -> LUMO+10  | 8.80%  |
|           |        | HOMO -> LUMO+12  | 4.20%  |
|           |        | HOMO -> LUMO+14  | 2.60%  |
|           |        | HOMO -> LUMO+15  | 2.40%  |
|           |        |                  |        |
| 264.56 nm | 0.0141 | HOMO-7 -> LUMO   | 76.80% |
|           |        | HOMO-2 -> LUMO+3 | 16.50% |
|           |        |                  |        |
| 262.03 nm | 0.0319 | HOMO-7 -> LUMO   | 9.40%  |
|           |        | HOMO-2 -> LUMO+2 | 2.90%  |

|  |  |                  |        |
|--|--|------------------|--------|
|  |  | HOMO-2 -> LUMO+3 | 25.30% |
|  |  | HOMO-1 -> LUMO+4 | 2.80%  |
|  |  | HOMO-1 -> LUMO+7 | 6.10%  |
|  |  | HOMO -> LUMO+6   | 7.00%  |
|  |  | HOMO -> LUMO+8   | 16.50% |
|  |  | HOMO -> LUMO+10  | 6.80%  |
|  |  | HOMO -> LUMO+12  | 4.00%  |

Table S7. Calculated transitions for **3a**.

| Wavelength | Intensity | Levels           | Character |
|------------|-----------|------------------|-----------|
| 388.42 nm  | 0.0099    | HOMO -> LUMO     | 98.20%    |
| 352.03 nm  | 0.0454    | HOMO-2 -> LUMO   | 36.80%    |
|            |           | HOMO-1 -> LUMO   | 59.50%    |
| 341.57 nm  | 0.1226    | HOMO-2 -> LUMO   | 59.20%    |
|            |           | HOMO-1 -> LUMO   | 35.90%    |
|            |           | HOMO -> LUMO+1   | 2.10%     |
| 322.23 nm  | 0.0606    | HOMO-1 -> LUMO   | 2.30%     |
|            |           | HOMO -> LUMO+1   | 94.60%    |
| 305.23 nm  | 0.0672    | HOMO -> LUMO+2   | 7.70%     |
|            |           | HOMO -> LUMO+3   | 80.10%    |
|            |           | HOMO -> LUMO+7   | 3.10%     |
| 299.62 nm  | 0.0065    | HOMO-1 -> LUMO+1 | 93.30%    |
| 293.28 nm  | 0.0005    | HOMO-4 -> LUMO   | 6.70%     |
|            |           | HOMO-3 -> LUMO   | 91.70%    |
| 292.39 nm  | 0.0373    | HOMO-4 -> LUMO   | 4.60%     |
|            |           | HOMO-1 -> LUMO+3 | 4.00%     |
|            |           | HOMO -> LUMO+2   | 78.90%    |
|            |           | HOMO -> LUMO+3   | 6.70%     |
|            |           | HOMO -> LUMO+4   | 2.10%     |
| 292.10 nm  | 0.0044    | HOMO-4 -> LUMO   | 84.80%    |
|            |           | HOMO-3 -> LUMO   | 6.60%     |
|            |           | HOMO -> LUMO+2   | 5.00%     |
| 290.90 nm  | 0.0019    | HOMO-2 -> LUMO+1 | 92.50%    |

|           |        |                  |        |
|-----------|--------|------------------|--------|
| 290.32 nm | 0.01   | HOMO-1 -> LUMO+2 | 5.80%  |
|           |        | HOMO-1 -> LUMO+3 | 64.40% |
|           |        | HOMO-1 -> LUMO+7 | 2.50%  |
|           |        | HOMO -> LUMO+2   | 6.70%  |
|           |        | HOMO -> LUMO+4   | 11.00% |
|           |        |                  |        |
| 280.96 nm | 0.0364 | HOMO-2 -> LUMO+3 | 22.30% |
|           |        | HOMO-1 -> LUMO+3 | 10.30% |
|           |        | HOMO-1 -> LUMO+4 | 2.10%  |
|           |        | HOMO -> LUMO+4   | 42.20% |
|           |        | HOMO -> LUMO+5   | 3.40%  |
|           |        | HOMO -> LUMO+9   | 4.00%  |
|           |        |                  |        |
| 277.93 nm | 0.0438 | HOMO-5 -> LUMO   | 91.70% |
|           |        | HOMO-2 -> LUMO+3 | 2.60%  |
|           |        |                  |        |
| 272.35 nm | 0.0034 | HOMO-2 -> LUMO+2 | 2.90%  |
|           |        | HOMO-2 -> LUMO+3 | 5.50%  |
|           |        | HOMO-1 -> LUMO+2 | 79.60% |
|           |        | HOMO-1 -> LUMO+3 | 5.10%  |
|           |        |                  |        |
| 268.33 nm | 0.0292 | HOMO-6 -> LUMO   | 4.60%  |
|           |        | HOMO-2 -> LUMO+1 | 2.10%  |
|           |        | HOMO-2 -> LUMO+2 | 7.20%  |
|           |        | HOMO-2 -> LUMO+3 | 34.30% |
|           |        | HOMO-2 -> LUMO+4 | 10.60% |
|           |        | HOMO-2 -> LUMO+9 | 2.00%  |
|           |        | HOMO-1 -> LUMO+2 | 9.20%  |
|           |        | HOMO-1 -> LUMO+3 | 3.70%  |
|           |        | HOMO -> LUMO+4   | 13.80% |
|           |        | HOMO -> LUMO+9   | 2.60%  |
|           |        |                  |        |
| 264.02 nm | 0.0003 | HOMO-2 -> LUMO+2 | 68.70% |
|           |        | HOMO-2 -> LUMO+3 | 4.90%  |
|           |        | HOMO-2 -> LUMO+4 | 10.60% |
|           |        | HOMO-1 -> LUMO+4 | 8.20%  |
|           |        |                  |        |



|           |        |                  |        |
|-----------|--------|------------------|--------|
| 262.73 nm | 0.0335 | HOMO-6 -> LUMO   | 16.80% |
|           |        | HOMO-2 -> LUMO+2 | 14.60% |
|           |        | HOMO-2 -> LUMO+4 | 5.50%  |
|           |        | HOMO-1 -> LUMO+4 | 37.40% |
|           |        | HOMO-1 -> LUMO+5 | 4.70%  |
|           |        | HOMO -> LUMO+7   | 2.10%  |
|           |        |                  |        |
| 260.04 nm | 0.1163 | HOMO-6 -> LUMO   | 63.70% |
|           |        | HOMO-5 -> LUMO+1 | 3.00%  |
|           |        | HOMO-2 -> LUMO+3 | 4.00%  |
|           |        | HOMO-1 -> LUMO+4 | 12.10% |
|           |        | HOMO -> LUMO+7   | 2.50%  |
|           |        |                  |        |
| 257.34 nm | 0.0364 | HOMO-2 -> LUMO+3 | 2.90%  |
|           |        | HOMO-2 -> LUMO+4 | 19.70% |
|           |        | HOMO-2 -> LUMO+5 | 2.90%  |
|           |        | HOMO -> LUMO+4   | 6.80%  |
|           |        | HOMO -> LUMO+5   | 45.10% |
|           |        | HOMO -> LUMO+7   | 6.00%  |
|           |        | HOMO -> LUMO+9   | 5.30%  |
|           |        |                  |        |
| 256.05 nm | 0.037  | HOMO-7 -> LUMO   | 67.20% |
|           |        | HOMO-6 -> LUMO   | 4.40%  |
|           |        | HOMO-3 -> LUMO+1 | 13.90% |
|           |        | HOMO -> LUMO+7   | 3.90%  |
|           |        |                  |        |
| 255.76 nm | 0.0084 | HOMO-7 -> LUMO   | 10.80% |
|           |        | HOMO-3 -> LUMO+1 | 83.80% |
|           |        |                  |        |
| 254.29 nm | 0.0112 | HOMO-4 -> LUMO+1 | 74.50% |
|           |        | HOMO-2 -> LUMO+4 | 2.50%  |
|           |        | HOMO -> LUMO+5   | 10.00% |
|           |        | HOMO -> LUMO+7   | 2.40%  |
|           |        |                  |        |
| 254.04 nm | 0.0395 | HOMO-7 -> LUMO   | 2.30%  |
|           |        | HOMO-4 -> LUMO+1 | 21.30% |
|           |        | HOMO-2 -> LUMO+3 | 2.50%  |

|           |        |                  |        |
|-----------|--------|------------------|--------|
|           |        | HOMO-2 -> LUMO+4 | 12.00% |
|           |        | HOMO-2 -> LUMO+5 | 2.40%  |
|           |        | HOMO -> LUMO+5   | 29.40% |
|           |        | HOMO -> LUMO+7   | 13.30% |
|           |        | HOMO -> LUMO+9   | 2.10%  |
|           |        | HOMO -> LUMO+11  | 2.20%  |
|           |        |                  |        |
| 252.12 nm | 0.2242 | HOMO-7 -> LUMO   | 4.10%  |
|           |        | HOMO-2 -> LUMO+4 | 9.90%  |
|           |        | HOMO-1 -> LUMO+4 | 9.40%  |
|           |        | HOMO -> LUMO+3   | 3.10%  |
|           |        | HOMO -> LUMO+5   | 2.00%  |
|           |        | HOMO -> LUMO+7   | 53.70% |
|           |        | HOMO -> LUMO+9   | 4.90%  |
|           |        |                  |        |
| 248.37 nm | 0.0114 | HOMO-10 -> LUMO  | 2.20%  |
|           |        | HOMO-9 -> LUMO   | 3.00%  |
|           |        | HOMO-8 -> LUMO   | 83.30% |
|           |        | HOMO-5 -> LUMO+1 | 5.30%  |

Table S8. Calculated transitions for **3b**.

| Wavelength | Intensity | Levels           | Character |
|------------|-----------|------------------|-----------|
| 410.32 nm  | 0.0098    | HOMO -> LUMO     | 97.20%    |
| 368.27 nm  | 0.0075    | HOMO-2 -> LUMO   | 9.20%     |
|            |           | HOMO-1 -> LUMO   | 40.70%    |
|            |           | HOMO -> LUMO+1   | 46.30%    |
| 363.85 nm  | 0.0234    | HOMO-2 -> LUMO   | 38.20%    |
|            |           | HOMO-1 -> LUMO   | 14.80%    |
|            |           | HOMO -> LUMO+1   | 42.50%    |
| 353.08 nm  | 0.1606    | HOMO-2 -> LUMO   | 46.80%    |
|            |           | HOMO-1 -> LUMO   | 42.10%    |
|            |           | HOMO -> LUMO+1   | 8.30%     |
| 332.59 nm  | 0.0216    | HOMO-1 -> LUMO+1 | 95.80%    |
| 323.23 nm  | 0.0044    | HOMO-2 -> LUMO   | 3.40%     |
|            |           | HOMO-2 -> LUMO+1 | 92.90%    |
| 307.74 nm  | 0.0005    | HOMO-3 -> LUMO   | 95.20%    |
|            |           | HOMO-3 -> LUMO+1 | 3.60%     |
| 305.86 nm  | 0.0012    | HOMO-4 -> LUMO   | 88.50%    |
|            |           | HOMO-4 -> LUMO+1 | 5.30%     |
|            |           | HOMO -> LUMO+3   | 3.30%     |
| 305.33 nm  | 0.0602    | HOMO-4 -> LUMO   | 3.60%     |
|            |           | HOMO -> LUMO+3   | 84.70%    |
|            |           | HOMO -> LUMO+7   | 3.30%     |
| 292.55 nm  | 0.0268    | HOMO-5 -> LUMO   | 2.20%     |
|            |           | HOMO-1 -> LUMO+3 | 18.10%    |
|            |           | HOMO -> LUMO+2   | 62.10%    |

|           |        |                  |        |
|-----------|--------|------------------|--------|
|           |        | HOMO -> LUMO+4   | 11.70% |
|           |        |                  |        |
| 289.98 nm | 0.001  | HOMO-5 -> LUMO   | 86.90% |
|           |        | HOMO -> LUMO+2   | 8.20%  |
|           |        |                  |        |
| 288.21 nm | 0.0296 | HOMO-5 -> LUMO   | 8.20%  |
|           |        | HOMO-1 -> LUMO+3 | 46.60% |
|           |        | HOMO -> LUMO+2   | 25.50% |
|           |        | HOMO -> LUMO+4   | 11.20% |
|           |        |                  |        |
| 284.66 nm | 0.0001 | HOMO-3 -> LUMO   | 3.70%  |
|           |        | HOMO-3 -> LUMO+1 | 95.00% |
|           |        |                  |        |
| 283.06 nm | 0.0002 | HOMO-4 -> LUMO   | 5.80%  |
|           |        | HOMO-4 -> LUMO+1 | 91.80% |
|           |        |                  |        |
| 280.39 nm | 0.0494 | HOMO-2 -> LUMO+3 | 23.30% |
|           |        | HOMO-1 -> LUMO+3 | 17.30% |
|           |        | HOMO-1 -> LUMO+4 | 2.90%  |
|           |        | HOMO -> LUMO+4   | 39.90% |
|           |        | HOMO -> LUMO+9   | 3.70%  |
|           |        |                  |        |
| 270.30 nm | 0.0075 | HOMO-6 -> LUMO   | 2.40%  |
|           |        | HOMO-2 -> LUMO+3 | 11.50% |
|           |        | HOMO-1 -> LUMO+2 | 69.50% |
|           |        | HOMO-1 -> LUMO+4 | 4.80%  |
|           |        | HOMO -> LUMO+4   | 2.70%  |
|           |        |                  |        |
| 268.92 nm | 0.0335 | HOMO-5 -> LUMO+1 | 9.60%  |
|           |        | HOMO-2 -> LUMO+3 | 33.90% |
|           |        | HOMO-2 -> LUMO+4 | 20.90% |
|           |        | HOMO-1 -> LUMO+2 | 7.10%  |
|           |        | HOMO-1 -> LUMO+3 | 3.30%  |
|           |        | HOMO-1 -> LUMO+4 | 2.60%  |
|           |        | HOMO -> LUMO+4   | 9.10%  |
|           |        |                  |        |
| 268.29 nm | 0.0597 | HOMO-6 -> LUMO   | 9.20%  |

|           |        |                  |        |
|-----------|--------|------------------|--------|
|           |        | HOMO-5 -> LUMO+1 | 76.90% |
|           |        | HOMO-1 -> LUMO+2 | 5.50%  |
|           |        |                  |        |
| 264.96 nm | 0.0241 | HOMO-13 -> LUMO  | 3.50%  |
|           |        | HOMO-12 -> LUMO  | 2.00%  |
|           |        | HOMO-7 -> LUMO   | 26.20% |
|           |        | HOMO-6 -> LUMO   | 42.20% |
|           |        | HOMO-5 -> LUMO+1 | 5.70%  |
|           |        | HOMO-2 -> LUMO+2 | 3.20%  |
|           |        | HOMO-2 -> LUMO+4 | 4.20%  |
|           |        | HOMO-1 -> LUMO+2 | 2.30%  |
|           |        | HOMO-1 -> LUMO+4 | 4.30%  |
|           |        |                  |        |
| 262.93 nm | 0.0085 | HOMO-7 -> LUMO   | 26.10% |
|           |        | HOMO-2 -> LUMO+2 | 34.00% |
|           |        | HOMO-2 -> LUMO+3 | 2.90%  |
|           |        | HOMO-2 -> LUMO+4 | 4.80%  |
|           |        | HOMO-1 -> LUMO+2 | 7.50%  |
|           |        | HOMO-1 -> LUMO+4 | 14.10% |
|           |        |                  |        |
| 261.53 nm | 0.03   | HOMO-9 -> LUMO   | 2.70%  |
|           |        | HOMO-7 -> LUMO   | 33.80% |
|           |        | HOMO-6 -> LUMO   | 19.20% |
|           |        | HOMO-5 -> LUMO+1 | 2.20%  |
|           |        | HOMO-2 -> LUMO+2 | 31.60% |
|           |        | HOMO-1 -> LUMO+4 | 2.50%  |
|           |        |                  |        |
| 260.71 nm | 0.0049 | HOMO-7 -> LUMO   | 7.60%  |
|           |        | HOMO-6 -> LUMO   | 11.50% |
|           |        | HOMO-2 -> LUMO+2 | 16.70% |
|           |        | HOMO-2 -> LUMO+3 | 2.20%  |
|           |        | HOMO-1 -> LUMO+2 | 3.40%  |
|           |        | HOMO-1 -> LUMO+4 | 38.80% |
|           |        | HOMO -> LUMO+7   | 5.00%  |
|           |        |                  |        |
| 257.28 nm | 0.0016 | HOMO-13 -> LUMO  | 24.10% |
|           |        | HOMO-12 -> LUMO  | 30.00% |

|           |        |                  |        |
|-----------|--------|------------------|--------|
|           |        | HOMO-10 -> LUMO  | 2.80%  |
|           |        | HOMO-8 -> LUMO   | 34.60% |
|           |        |                  |        |
| 255.72 nm | 0.0154 | HOMO-13 -> LUMO  | 6.60%  |
|           |        | HOMO-12 -> LUMO  | 7.00%  |
|           |        | HOMO-8 -> LUMO   | 24.20% |
|           |        | HOMO-6 -> LUMO   | 3.70%  |
|           |        | HOMO-2 -> LUMO+2 | 4.60%  |
|           |        | HOMO-2 -> LUMO+3 | 2.80%  |
|           |        | HOMO-2 -> LUMO+4 | 15.80% |
|           |        | HOMO -> LUMO+5   | 15.20% |
|           |        | HOMO -> LUMO+9   | 6.00%  |
|           |        |                  |        |
| 255.59 nm | 0.0095 | HOMO-13 -> LUMO  | 8.80%  |
|           |        | HOMO-12 -> LUMO  | 10.40% |
|           |        | HOMO-10 -> LUMO  | 2.00%  |
|           |        | HOMO-8 -> LUMO   | 28.50% |
|           |        | HOMO-2 -> LUMO+2 | 3.40%  |
|           |        | HOMO-2 -> LUMO+4 | 15.20% |
|           |        | HOMO -> LUMO+5   | 12.70% |
|           |        | HOMO -> LUMO+7   | 2.40%  |
|           |        | HOMO -> LUMO+9   | 2.90%  |

Figure S9. Calculated absorption spectra of complexes **2a**, **2b**, **3a**, and **3b**.

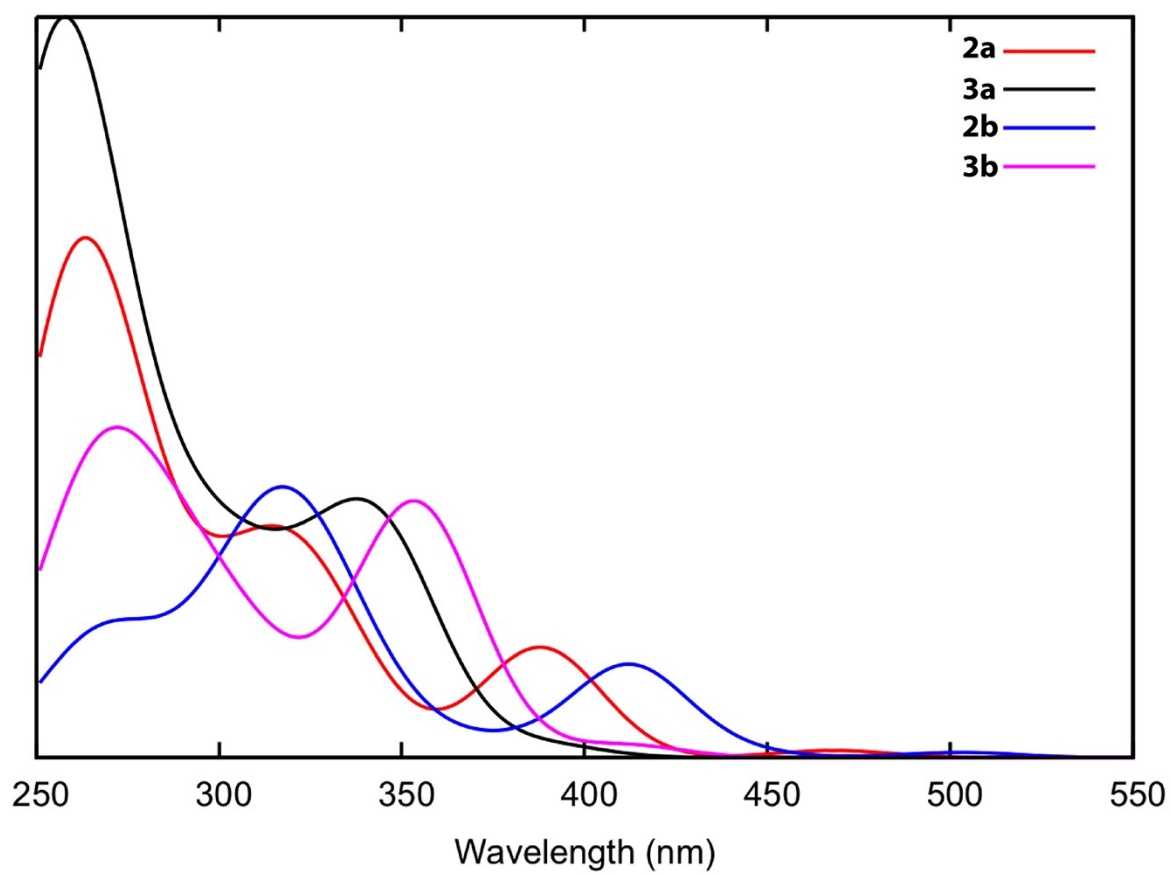

Supplement: c5nj03301b1.pdf [file c5nj03301b1.pdf]
